# Supplementary material for: Cdc28–Cln3 phosphorylation of Sla1 regulates actin patch dynamics in different modes of fungal growth
Source: PubMed Central journal article supplement — Mol Biol Cell. 2012 Sep 1;23(17):3485–97. doi: 10.1091/mbc.E12-03-0231 (PMC3431942; doi:10.1091/mbc.e12-03-0231), 2012-09-01
Supplement: supp_E12-03-0231_5-Supplemental_Mats-Final.pdf [file supp_E12-03-0231_5-Supplemental_Mats-Final.pdf]

## **Supplementary Information**

### **Cdc28–Cln3 phosphorylation of Sla1 regulates actin patch dynamics in different modes of fungal growth**

Guisheng Zeng, Yan-Ming Wang, and Yue Wang

# Figure S1

MSSIIYIGVYK**ALYDYAAQAEEELNIKQNDLLYLLEKSDIDDWWKVKR**VVATGEE  
 IVDEPSGLVPSTYIEEAPVIKTATALYDYDKQTEEELSFNENDKFNVFDLNDPDW  
 ILVGD**LAK**E**KFGFVPSNYIQ**LDSTAEPAQHQQQQPQQVFQPPPQQQQAIPQQQTQ  
 IPINNFPPPP**THKDRTPDFPAPP**AHRDR**SPEHPPPTPEKDYPRMFEQEPR**SLGSR  
 YDRQPEGREEEEDEAPPMP**SRPTGS**NIVAPEPVVGRSNTYEQ**ENVEHSEHSYD**  
 GEFFT**WYIDEVDGRKKRAIKLSIGQGLVI**IKPNTTNP**KKLRMRSSSSLDN**QWRIK  
 DLITFNNEK**KHVFL**E**FKNPAASLE**LHAGSKDVAEAIMAILGDLKGAEAAHGLREV  
 AKASKA**SANERNRKIG**RLLYDFEVQGDDELDCKEGDEVYIIDQ**KKSKD**WWMVENI  
 ATRRQGVVPSTYIEIIISTSNLDKLT**DGPLRRKSTKSKGRVVETKDKR**SSHRTRE  
 ERDRIREKDRAQRDKAPTSQTEQDKSMPNFHRVRTWIDSSGTFK**VEAEFLGC**VEG  
 KIH**LHKTNGVKIAVAADKLS**VEDLEYVERVTGTSLEQYKEQVMK**QQA**KRAKSKSK  
 SGATAT**PSSTNETKYASSATAA**INDIAPPKPTRPQTTTQVS**NGAPLYDWF**DFFL  
 ECGVDIGNCQRYTLNFEREQMDENILEDIS**PSLLRTLGLREGDI**IRVMKYLD**AKF**  
 DR**KKTPEAPQ**ONGGLFIDKNGNLK**NNSSSTEISKVSADALP**SPVKTQ**VTSFT**PVN  
 ESTQ**NNKIEDDAWAMKPAAR**SEDLLK**PSQPQTPQYT**GALSDLVNIK**PVGTSN**  
 ENKAKTEQIPVEPSAPALQ**PMKTSNTAATSSIPPQ**PGV**TPQRTGTLVPVQKTGG**  
 LVPVQ**RTGAGLVPVQTGGYLPAQPTGFVPI**TAQ**PTGFIP**IQATGILQ**PQLT**FGIV  
 PLQ**TGTSTFNANNKTAPPRPDTAPPPITTFGQQPTFQPAFVPLQ**TGVIT**MPQ**TTF  
 GGQ**SQQLPTQITGGAPPQTSFNQ**PALV**PTQRTGGQITGGFVPQSNFGKQITGGFM**  
 DTNTLSFGQQITGNAQQQPP**ST**SFGQQITGGLPAT**SFGQQITGGFPQTSFGQQM**  
 TGGAPQ**TSFGQHITGGNMPNTSFGQ**PFSQQATSN**PF**PQMANQ**FTQQQQYQQQQPV**  
 MNQ**FQQQPQQQQPFYNQFQSQPNLNQMTNMFQNTSIS**SPATFN**QQIPTTTFGQQ**  
 PQ**FEGFGSQPLQSQPTGMGFGNAPLQSQPTGKRANLQAATPDNPF**GF

**Figure S1.** MS mapping of phosphorylation sites on Sla1. Amino acids covered by the mapping are highlighted in bold. CDK consensus sites are shaded in grey and putative Prk1 recognition motifs are underlined. Asterisks (\*): phosphorylated Thr or Ser within CDK sites; Black dots (•): phosphorylated Thr within Prk1 recognition motifs; Open circles (o): Other phosphorylated Thr and Ser residues.

## Figure S2

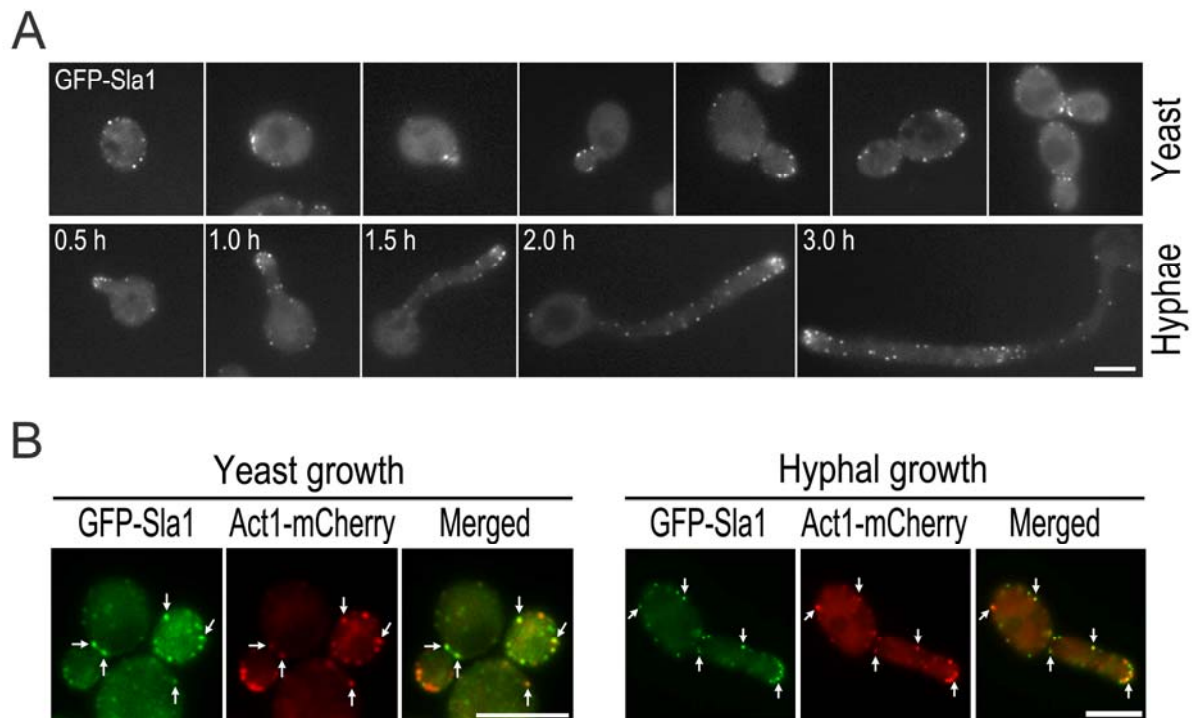

**Figure S2.** Subcellular localization of Sla1 during yeast and hyphal growth. **(A)** Visualization of GFP-Sla1 in yeast and hyphal cells of GZY707 (*sla1* $\Delta$ /*P<sub>MET3</sub>-GFP-SLA1*). **(B)** Visualization of GFP-Sla1 and Act1-mCherry in yeast and hyphal cells of GZY752 (*sla1* $\Delta$ /*P<sub>MET3</sub>-GFP-SLA1 ACT/ACT1-mCherry*). Cells were either grown in GMM at 30°C, or induced for hyphal formation by incubating with 20% FBS at 37°C for several hours. Samples were taken at the indicated time points and cells were fixed with Stopmix before microscopic visualization. Note that Act1-mCherry is not fully functional in vivo and results in abnormal hyphal morphology.

Figure S3

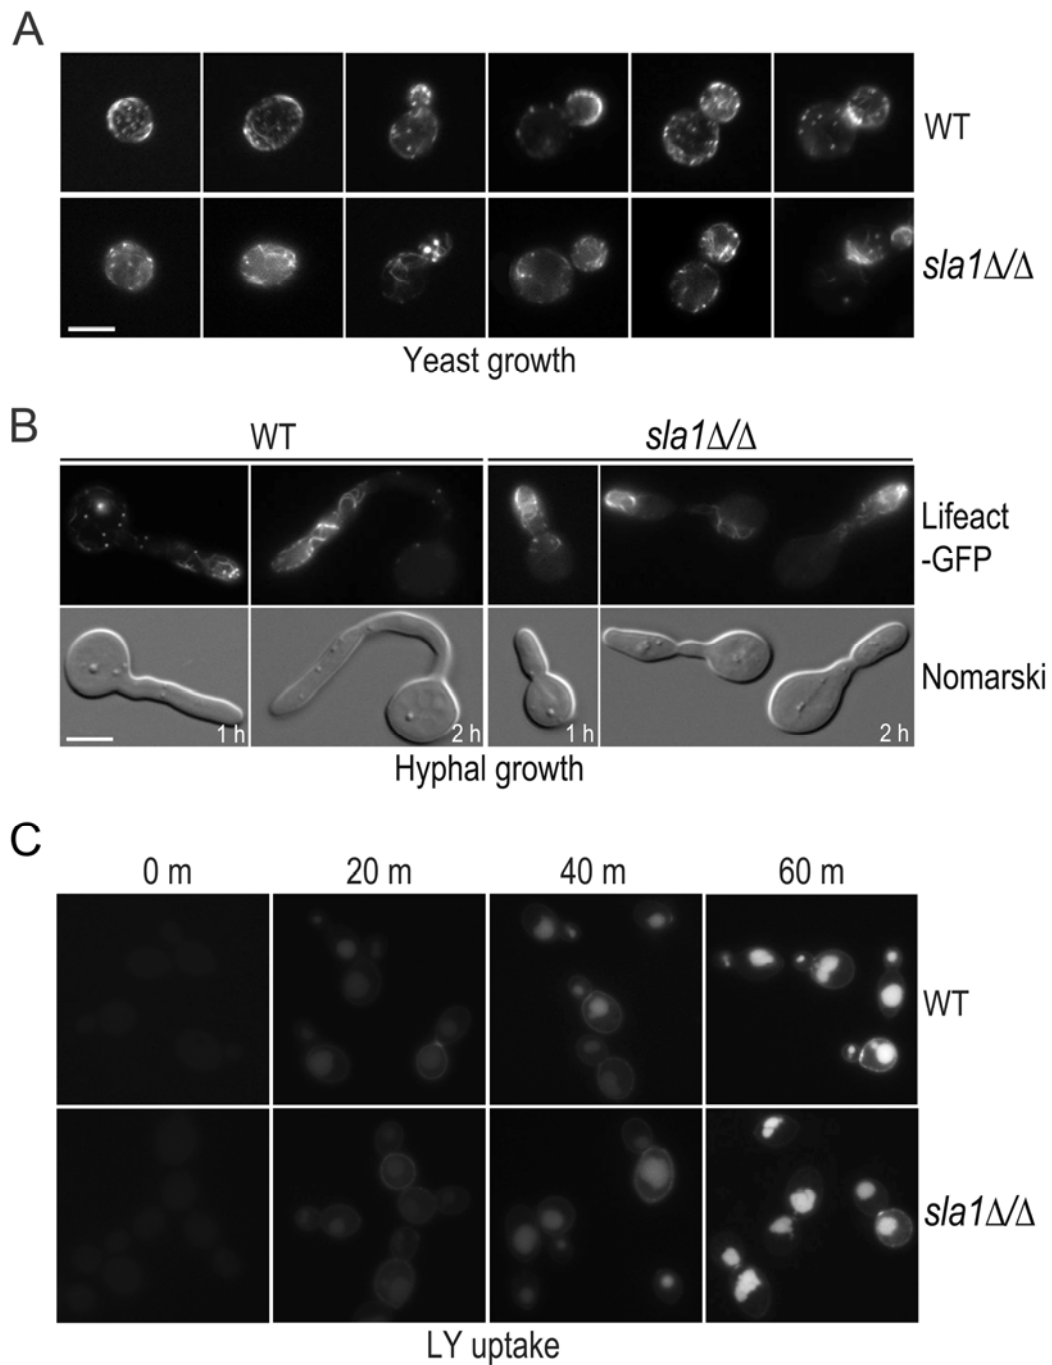

**Figure S3.** Actin cytoskeleton organization and LY uptake in *sla1Δ/Δ* cells. (**A** and **B**) Direct visualization of actin cytoskeleton in the *sla1Δ/Δ* cells during yeast (A) and hyphal growth (B). WT (GZY730) and *sla1Δ/Δ* (GZY733) cells expressing Lifeact-GFP were either grown in GMM at 30°C or induced for hyphal growth with 20% FBS at 37°C for 1 to 2 h. Cells were fixed with Stopmix for microscopy. (**C**) LY uptake of the *sla1Δ/Δ* cells. WT (BWP17) and *sla1Δ/Δ* (GZY602) cells were grown in GMM at 30°C and incubated with LY for 20, 40, and 60 min, respectively. Cells were washed with PBS and examined for LY uptake.

Figure S4

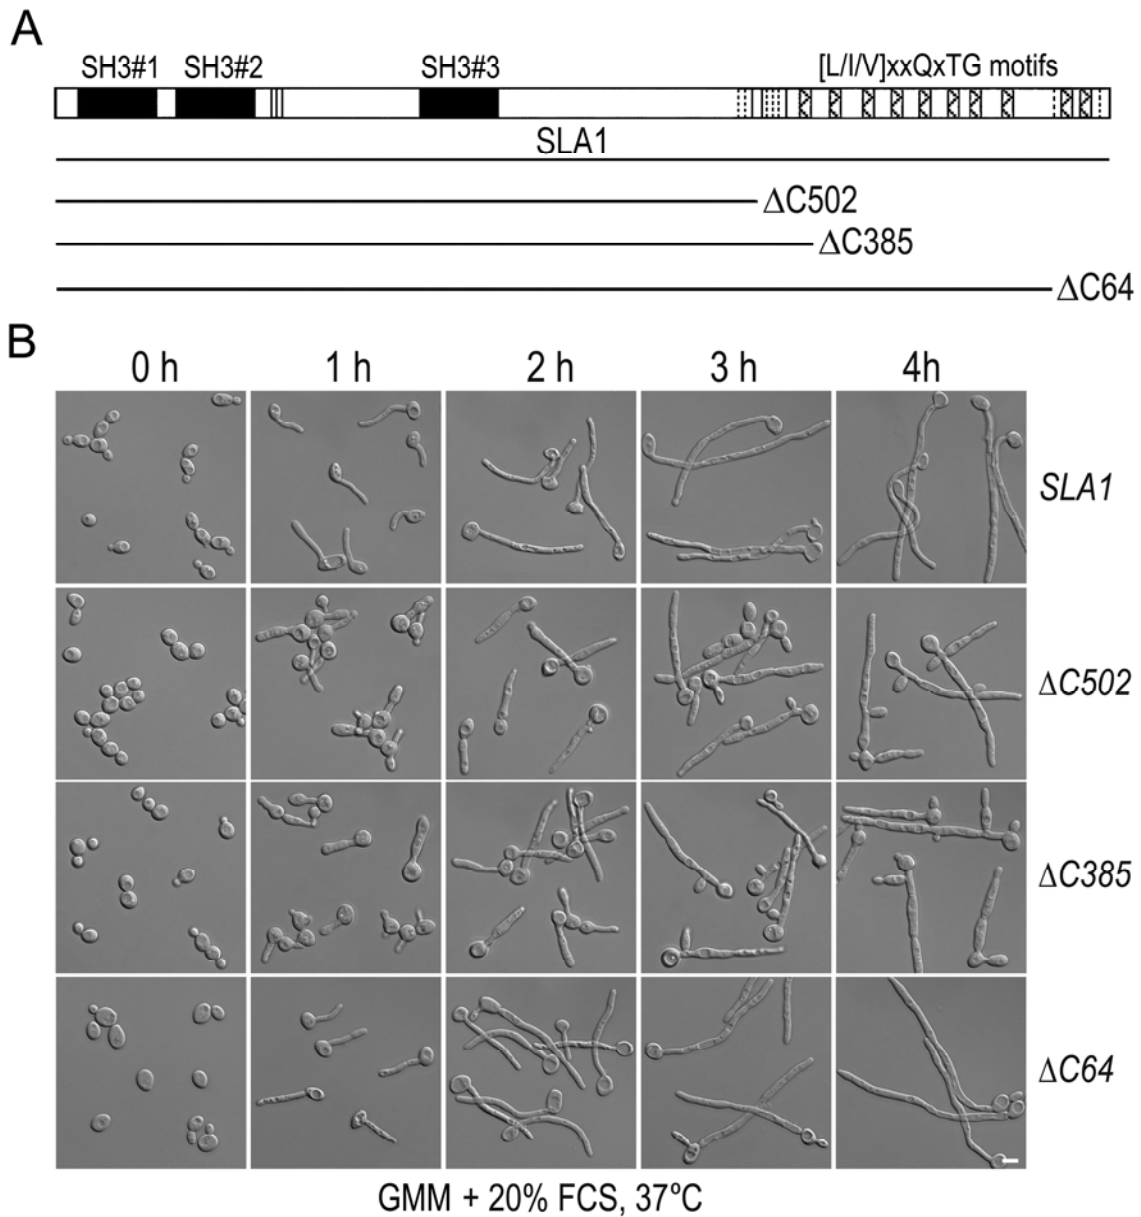

**Figure S4.** Defective hyphal formation of *sla1* C-terminal truncated mutants. **(A)** Schematic diagram to indicate the regions absent in different *sla1* mutants. **(B)** Hyphal morphology of the *sla1* C-terminal truncated mutants. Cells of *SLA1*-WT (GZY652), *sla1*- $\Delta C502$  (GZY625), *sla1*- $\Delta C385$  (GZY629), and *sla1*- $\Delta C64$  (GZY639) were grown in YPD at 30°C and induced for hyphal growth by incubation with 20% of FBS at 37°C. Samples were taken at 1-h intervals upon hyphal induction for morphological examination.

- Movie 01.** Live cell imaging of Lifeact-GFP in BWP17 (GZY730) yeast cells.
- Movie 02.** Live cell imaging of Lifeact-GFP in *sla1* $\Delta/\Delta$  (GZY733) yeast cells.
- Movie 03.** Live cell imaging of Lifeact-GFP in BWP17 (GZY730) hyphal cells.
- Movie 04.** Live cell imaging of Lifeact-GFP in *sla1* $\Delta/\Delta$  (GZY733) hyphal cells.

## References

- Murad, A.M., Lee, P.R., Broadbent, I.D., Barelle, C.J., and Brown, A.J. (2000). Clp10, an efficient and convenient integrating vector for *Candida albicans*. *Yeast* *16*, 325-327.
- Sinha, I., Wang, Y.M., Philp, R., Li, C.R., Yap, W.H., and Wang, Y. (2007). Cyclin-dependent kinases control septin phosphorylation in *Candida albicans* hyphal development. *Dev Cell* *13*, 421-432.
- Wilson, R.B., Davis, D., and Mitchell, A.P. (1999). Rapid hypothesis testing with *Candida albicans* through gene disruption with short homology regions. *J Bacteriol* *181*, 1868-1874.
- Zheng, X., Wang, Y.M., and Wang, Y. (2004). Hgc1, a novel hypha-specific G1 cyclin-related protein regulates *Candida albicans* hyphal morphogenesis. *EMBO J* *23*, 1845-1856.

**Table S1.** Yeast strains used in this study

| Strain | Relevant genotype*                                                                                 |
|--------|----------------------------------------------------------------------------------------------------|
| BWP17  | <i>ura3::imm434/ura3::imm434 his1::hisG/his1::hisG arg4::hisG/arg4::hisG</i> (Wilson et al., 1999) |
| IS82   | <i>ccn1Δ::URA3-FLP/ccn1Δ::ARG4</i> (Sinha et al., 2007)                                            |
| IS89   | <i>cdc28<sup>F85G</sup>-ARG4/cdc28Δ::HIS1</i> (Sinha et al., 2007)                                 |
| WYZ12  | <i>hgc1Δ::ARG4/hgc1Δ::HIS1</i> (Zheng et al., 2004)                                                |
| GZY559 | <i>CLN3/CLN3-Myc-URA3</i>                                                                          |
| GZY584 | <i>SLA1/SLA1-HA-ARG4</i>                                                                           |
| GZY585 | <i>CLN3/CLN3-Myc-URA3 SLA1/SLA1-HA-ARG4</i>                                                        |
| GZY601 | <i>SLA1/sla1Δ::FRT</i>                                                                             |
| GZY602 | <i>sla1Δ::FRT/sla1Δ::ARG4</i>                                                                      |
| GZY603 | <i>cln3Δ::FRT/P<sub>MET3</sub>-Myc-CLN3-ARG4</i>                                                   |
| GZY622 | <i>cln3Δ::FRT/P<sub>MET3</sub>-Myc-CLN3-ARG4 SLA1/SLA1-HA-URA3</i>                                 |
| GZY624 | <i>hgc1Δ::ARG4/hgc1Δ::HIS1 SLA1/SLA1-HA-URA3</i>                                                   |
| GZY625 | <i>sla1Δ::FRT/sla1Δ::ARG4 sla1-ΔC502-HA-URA3</i>                                                   |
| GZY629 | <i>sla1Δ::FRT/sla1Δ::ARG4 sla1-ΔC385-HA-URA3</i>                                                   |
| GZY631 | <i>SLA1/P<sub>GAL1</sub>-HA-SLA1-URA3</i>                                                          |
| GZY639 | <i>sla1Δ::FRT/sla1Δ::ARG4 sla1-ΔC64-HA-URA3</i>                                                    |
| GZY641 | <i>cdc28<sup>F85G</sup>-ARG4/cdc28Δ::HIS1 CLN3/CLN3-Myc-URA3</i>                                   |
| GZY652 | <i>sla1Δ::FRT/sla1Δ::ARG4 SLA1-WT-HA-URA3</i>                                                      |
| GZY658 | <i>sla1Δ::FRT/sla1Δ::ARG4 sla1-13A-HA-URA3</i>                                                     |
| GZY670 | <i>sla1Δ::FRT/sla1Δ::ARG4 sla1-13E-HA-URA3</i>                                                     |
| GZY707 | <i>sla1Δ::FRT/P<sub>MET3</sub>-GFP-SLA1-URA3</i>                                                   |
| GZY718 | <i>sla1Δ::FRT/sla1Δ::ARG4 SLA1-WT-HA-URA3 PAN1/PAN1-Myc-HIS1</i>                                   |
| GZY719 | <i>sla1Δ::FRT/sla1Δ::ARG4 sla1-13A-HA-URA3 PAN1/PAN1-Myc-HIS1</i>                                  |
| GZY720 | <i>sla1Δ::FRT/sla1Δ::ARG4 sla1-13E-HA-URA3 PAN1/PAN1-Myc-HIS1</i>                                  |
| GZY727 | <i>sla1Δ::FRT/sla1Δ::ARG4 sla1-23E-HA-URA3</i>                                                     |
| GZY730 | <i>TEF1/tef1::P<sub>TEF1</sub>-LifeAct-GFP-HIS1</i>                                                |
| GZY733 | <i>sla1Δ::URA3-FLP/sla1Δ::ARG TEF1/tef1::P<sub>TEF1</sub>-Lifeact-GFP-HIS1</i>                     |
| GZY739 | <i>sla1Δ::FRT/sla1Δ::ARG4 SLA1-WT-HA-URA3 TEF1/tef1:: P<sub>TEF1</sub>-LifeAct-GFP-HIS1</i>        |
| GZY740 | <i>sla1Δ::FRT/sla1Δ::ARG4 sla1-13A-HA-URA3 TEF1/tef1:: P<sub>TEF1</sub>-LifeAct-GFP-HIS1</i>       |
| GZY741 | <i>sla1Δ::FRT/sla1Δ::ARG4 sla1-13E-HA-URA3 TEF1/tef1:: P<sub>TEF1</sub>-LifeAct-GFP-HIS1</i>       |

GZY742 *ccn1Δ::FRT/ccn1Δ::ARG4*  
GZY744 *ccn1Δ::FRT/ccn1Δ::ARG4 SLA1/SLA1-HA-URA3*  
GZY745 *prk1Δ::ARG4/prk1Δ::HIS1 SLA1/sla1Δ::FRT*  
GZY746 *MET3/MET3::P<sub>MET3</sub>-ARN1-GFP-URA3*  
GZY747 *sla1Δ::FRT/sla1Δ::ARG4 MET3/MET3::P<sub>MET3</sub>-ARN1-GFP-URA3*  
GZY750 *prk1Δ::ARG4/prk1Δ::HIS1 sla1Δ::FRT/SLA1-HA-URA3*  
GZY752 *SLA1/P<sub>MET3</sub>-GFP-SLA1-HIS1 ACT1/ACT1-mCherry-TADH1-URA3*  
GZY761 *sla1Δ::FRT/sla1Δ::ARG4 SLA1-WT-HA-URA3 MET3/MET3::P<sub>MET3</sub>-ARN1-GFP-HIS1*  
GZY762 *sla1Δ::FRT/sla1Δ::ARG4 sla1-13A-HA-URA3 MET3/MET3::P<sub>MET3</sub>-ARN1-GFP-HIS1*  
GZY763 *sla1Δ::FRT/sla1Δ::ARG4 sla1-13E-HA-URA3 MET3/MET3::P<sub>MET3</sub>-ARN1-GFP-HIS1*

---

\* Strains used in this study are of derivatives of BWP17.



**Table S2. Plasmid constructs used in this study**

| Construct | Description                                                                                                                                                                                                                                                                                                                                                                                                        |
|-----------|--------------------------------------------------------------------------------------------------------------------------------------------------------------------------------------------------------------------------------------------------------------------------------------------------------------------------------------------------------------------------------------------------------------------|
| CIP10U    | Yeast integration vector generated by removing the <i>RP10</i> gene from CIP10 (Murad <i>et al.</i> , 2000).                                                                                                                                                                                                                                                                                                       |
| pYGS829   | CLN3c-Myc-UTR/CIP10U; DNA fragment encoding Cln3 (268-465 aa) was cloned in frame with a C-terminal 6xMyc epitope (followed by <i>UTR</i> , the 3' untranslated region of <i>CaGAL4</i> ) into CIP10U. The plasmid was linearized by <i>BamHI</i> within <i>CLN3</i> for integration to generate <i>CLN3-Myc-URA3</i> .                                                                                            |
| pYGS837   | GST-CLN3; DNA fragment encoding Cln3 (1-465 aa) was cloned into pGEX-4T-1.                                                                                                                                                                                                                                                                                                                                         |
| pYGS859   | SLA1c-HA-UTR/CIP10U; DNA fragment encoding Sla1 (658-1257 aa) was cloned in frame with a C-terminal 2xHA epitope (followed by <i>UTR</i> ) into CIP10U. The plasmid was linearized by <i>XcmI</i> within <i>SLA1</i> for integration to generate <i>SLA1-HA-URA3</i> .                                                                                                                                             |
| pYGS861   | CLN3ΔURA3-FLP/pBKS; <i>CLN3</i> promoter region (-556 to -1 bp) and terminator region (1399 to 1773 bp) were cloned to flank the <i>CaURA3</i> flipper in pBKS vector. The knock-out cassette was released by <i>KpnI</i> and <i>SacII</i> for transformation to generate <i>cln3Δ::FRT</i> .                                                                                                                      |
| pYGS868   | SLA1ΔURA3-FLP/pBKS; <i>SLA1</i> promoter region (-509 to -1 bp) and terminator region (3775 to 4240 bp) were cloned to flank the <i>CaURA3</i> flipper in pBKS vector. The knock-out cassette was released by <i>KpnI</i> and <i>SacII</i> for transformation to generate <i>sla1Δ::URA3-FLP</i> and <i>sla1Δ::FRT</i> .                                                                                           |
| pYGS870   | SLA1ΔARG4/pBKS; <i>CaURA3</i> flipper in pYGS868 was replaced with <i>CaARG4</i> . The knock-out cassette was released by <i>KpnI</i> and <i>SacII</i> for transformation to generate <i>sla1Δ::ARG4</i> .                                                                                                                                                                                                         |
| pYGS877   | CLN3ΔARG4-P <sub>MET3</sub> -Myc/pTEZ; <i>CLN3</i> promoter region (-444 to -1 bp) and coding region (1 to 500 bp) were cloned to flank <i>ARG4-P<sub>MET3</sub>-Myc</i> ( <i>CaARG4</i> followed by 6xMyc epitope under <i>CaMET3</i> promoter control) in pTEZ vector. The knock-in cassette was released by <i>KpnI</i> and <i>SacII</i> for transformation to generate <i>P<sub>MET3</sub>-Myc-CLN3-ARG4</i> . |
| pYGS893   | SLA1c-HA-UTR/CIP10A; <i>CaURA3</i> in pYGS859 was replaced with <i>CaARG4</i> . The plasmid was linearized by <i>XcmI</i> within <i>SLA1</i> for integration to generate <i>SLA1-HA-ARG4</i> .                                                                                                                                                                                                                     |
| pYGS894   | SLA1ΔC502-HA-UTR/CIP10U; DNA fragment encoding Sla1 (457-755 aa) was cloned in frame with a C-terminal 2xHA epitope (followed by <i>UTR</i> ) into CIP10U. The plasmid was linearized by <i>SaII</i> within <i>SLA1</i> for integration to generate <i>SLA1ΔC502-HA-URA3</i> .                                                                                                                                     |
| pYGS895   | P <sub>GAL1</sub> -HA-SLA1n/CIP10U; DNA fragment encoding Sla1 (1-304 aa) was cloned in frame with an N-terminal 2xHA epitope (under <i>CaGAL1</i> promoter control) into CIP10U. The plasmid was linearized by <i>BsaBI</i> within <i>SLA1</i> for integration to generate <i>P<sub>GAL1</sub>-HA-SLA1-URA3</i> .                                                                                                 |
| pYGS896   | SLA1ΔC385-HA-UTR/CIP10U; DNA fragment encoding Sla1 (457-872 aa) was cloned in frame with a C-terminal 2xHA epitope (followed by <i>UTR</i> ) into CIP10U. The plasmid was linearized by <i>SaII</i> within <i>SLA1</i> for integration to generate <i>SLA1ΔC64-HA-URA3</i> .                                                                                                                                      |
| pYGS913   | SLA1ΔC64-HA-UTR/CIP10U; DNA fragment encoding Sla1 (658-1193 aa) was cloned in frame with a C-terminal 2xHA epitope (followed by <i>UTR</i> ) into CIP10U. The plasmid was linearized by <i>XcmI</i> within <i>SLA1</i> for integration to generate <i>SLA1ΔC385-HA-URA3</i> .                                                                                                                                     |
| pYGS920   | Pro-SLA1-WT-HA-UTR/CIP10U; DNA fragment containing <i>SLA1</i> promoter and coding region (-1000 to 3771 bp) was cloned in frame with a C-terminal 2xHA epitope (followed by <i>UTR</i> ) into CIP10U. The plasmid was linearized by <i>PmeI</i> (generated by mutagenesis at promoter region -550 bp) for integration to generate <i>SLA1-WT-HA-URA3</i> .                                                        |



**Table S3. List of GST-Cln3 affinity purified proteins identified by MS**

| Protein ID   | Matched Peptides (Bold) |                   |                   |                   |                   |                   |                    |                    |                    |                   |                    |
|--------------|-------------------------|-------------------|-------------------|-------------------|-------------------|-------------------|--------------------|--------------------|--------------------|-------------------|--------------------|
| <b>URA2</b>  | 1                       | MAQLSVPIPT        | PMESTGDVLM        | TLETQDGIAL        | QGYSFGAAPK        | AAGEVVFQTD        | MVGPESITD          | PSYEGQILVI         | TYPLVGNVYV         | PDRELLDEDY        | <b>EPALPKYFES</b>  |
|              | 101                     | NKIHIAGLV         | AHYTEEYSHW        | LAKSSSLGKWL       | QEQQIPAIYG        | VDTRSLTKRL        | REKSTLGLRL         | AIQNSDYKSE         | EIISQSKSNP         | QNKWKFVFPV        | <b>EFDDPNVKNL</b>  |
|              | 201                     | VAKVSTDKPI        | LITTPKNTNEN       | IKLGMKNGKI        | RLLAVDVGMK        | YQIRSCFVRK        | GEVLLVVPWD         | YDFTFTEYDG         | LFISNMGPCD         | AVMMDKTVERL       | <b>QKILKEGKTP</b>  |
|              | 301                     | VFGICLGHQL        | LARATGASTL        | KLKFGNRGHN        | IPCTSTISGR        | CYITSONHG Y       | AVDTATLSNG         | WKELFVNAND         | GSNNEGIYHS         | KPFFSVQFHP        | <b>ESTPGPRDTE</b>  |
|              | 401                     | FLFDVFIKSV        | <b>VDNFQSGGVY</b> | <b>KQVEFPGGKL</b> | AENRAAHPKV        | DVKKVLVLGS        | GGLSIGQAGE         | FDYSGSQAIK         | ALKEEGEYTV         | LINPNIAITQI       | <b>TSKGLADKVV</b>  |
|              | 501                     | <b>FLPVTPEFVR</b> | KVIKHERPDG        | IYCTFGGQTA        | LSVGIALKDE        | FEGLGVKVLG        | TQIDTVITTE         | DRELFASAMA         | EINEKCARSE         | ACNTVKEADV        | <b>AANAIGYPLI</b>  |
|              | 601                     | <b>VRAAYALGGL</b> | GSGFADNEEE        | LVALCNKAKA        | <b>TSPQVLVERS</b> | MKGWKEVEYE        | VVRDAFDNCI         | TVCNMENFDP         | LGIHTGDSIV         | VAPSQTLSDS        | <b>DYNMLRRTAV</b>  |
|              | 701                     | NVIRHLGVV         | ECNIQYALNP        | FSKEYCILEV        | NARLSRSSAL        | ASKATGYPLA        | YTAAKLGLNI         | <b>PLNEIKNSVT</b>  | KSTSACFPEV         | LDYCVVKIPR        | <b>WDLKCFTRVS</b>  |
|              | 801                     | ALLSSSMKSV        | PMSMAIGRTF        | EEAIQKAIRS        | TDYHNLGFNK        | TAAALMSIDID       | QELQTPSDQR         | LFAIANALSD         | GYSVDKVKFL         | TNIDKWFNLK        | <b>LDGLIKFNGK</b>  |
|              | 901                     | IASYGAKEDV        | GEMSLRQAKQ        | LGFEEDRQIAK       | FLGSNEVAIR        | RLRKDAGIIP        | FVKQIDTVAA         | EFPFAFTNYLY        | VYNNADSSDV         | KPDDNGVIVL        | <b>GSGVVRIGSS</b>  |
|              | 1001                    | VEFDWCVA          | IRTLRENNVK        | TVMINYNPET        | VSTDYDEADR        | <b>LYFEPINLER</b> | VLDIYDLQES         | SGVIISMGGQ         | TSNNIALPLY         | RQNVKILGTS        | <b>PEMIDSAENR</b>  |
|              | 1101                    | YKFSRMLDRI        | GVDQPAWKE         | TSIDEAEDFA        | EKVGYPVLVR        | PSYVLSGAM         | NTVYSKDDLA         | <b>SYLGGQAVDVS</b> | <b>PDYVPIVTKY</b>  | TENAKEIEMD        | <b>AVAKDGKMM</b>   |
|              | 1201                    | HVVSHEVENA        | GVHSGDATLI        | VPPQDLDPET        | VRRIVEATAK        | IGKALDITGP        | YNIQPIAKDN         | DIKVICENVR         | ASRSPFPVSK         | VVGVDLIEMA        | <b>TKAMLDLPIV</b>  |
|              | 1301                    | PYPGERLPED        | YCAVKVPEFS        | FSRLAGADPV        | LGVEMASTGE        | VATFGKNKYE        | AYLKSLLISTG        | FKLPKKNILF         | SIGSFKEQEK         | LLPSIAKLHE        | <b>LGKIFPATAG</b>  |
|              | 1401                    | TADFLIKEHGI       | PVHYLEVLSK        | DEDQKSEYNL        | SQHLANNLID        | LYVNLPSANR        | FRRPASYMSK         | GYESRRMAVD         | YAVPLVTNVK         | NAKLLVEAIA        | <b>RNISLEVSNR</b>  |
|              | 1501                    | DAFDNHSHTAI       | LPGLINITSF        | ATSFDDFEQT        | TKESLAAGFT        | FNAPLPHQTA        | GASVTDYRSL         | IDAIDAVGAS         | AYTDSVSIAS         | ASETNSQSVS        | <b>DAADNAGSLD</b>  |
|              | 1601                    | LPFNTFSGAT        | VNSALTAQFSS       | WPNNPKPIITD       | AKTDTLDSVLT       | LLASLYNRSI        | HLTGVSCKED         | LDLTKMAKEK         | LTQVTCDAV          | HLVFTSKDEL        | <b>DPYLPNKSFL</b>  |
|              | 1701                    | QYLYWENLKD        | VDCFSIGVLP        | YLIAKASGTE        | IAPGMGKIEA        | VPDLLTAVKA        | GKLTIGDIVS         | KPHDNPAKIF         | NLKPQDAQV          | LDLDFEATVE        | <b>PVYPEFSKLR</b>  |
|              | 1801                    | LRGAVERVNSF       | HNETVVLDSG        | VLSQIALGKN        | EVVPRSRFGS        | TAGIPESPLR        | GKRVVSPFSSD        | MRRPRLAPET         | PEPQPAIFEK         | <b>LVGSDVSOPI</b> | <b>AGSLGEIAAL</b>  |
|              | 1901                    | <b>SDYIRHNSVP</b> | LRNNIISVKD        | ITRSDLLHSLF       | TVAQEMRLAV        | TRHGVDLQLQ        | GNRVLATMFYE        | PSTRITSTSPD        | AAMRQVIFXK         | VADVHGSSSV        | <b>KSKLGTQDIT</b>  |
|              | 2001                    | RTLSCYSDAI        | VLRHPSSESA        | DIAAKYSPVP        | <b>IINAGNGTKE</b> | HPTQALLDLF        | TIREELGTVN         | GITVTTFMGDL        | XYGRPVHSLC         | HLLRHYQVRV        | <b>QLVAPKELQI</b>  |
|              | 2101                    | PAEIRQLQID        | NNMLIAESE         | LTKELILARS        | VLVYCTRVQEE       | RFADKEQYQR        | LKDTYIVDNK         | ILSNAKQHM          | VMHPLRPTNE         | IREEVPDPQR        | <b>AAYFRQMRHG</b>  |
| 2201         | LFIRMALLAM              | VIGVDF            |                   |                   |                   |                   |                    |                    |                    |                   |                    |
| <b>FAS1</b>  | 1                       | MSTHRPFLQT        | HGSIEHTLLV        | PNDLFFNYSQ        | LKDFEIKTLP        | EPTGEGAGDD        | EPSSPAELYG         | KFIGFISNAQ         | FPQIVELSLK         | DFESRFLDNN        | <b>NDNIHSAFAV</b>  |
|              | 101                     | LLDDETYPTT        | IAKVKENIVK        | NYKAVKNSIN        | KVESNLLYHC        | KHDAKVAIFV        | GGQNTDDYF          | EELRELYTLY         | QGLIEBLLVS         | IAEKLNLQHP        | <b>SFDKIYQGL</b>   |
|              | 201                     | NILSLWKHPE        | TPDQDYLLS         | VPVSCFVICV        | IQLCHYITTC        | <b>KVGLLTPGFE</b> | RNSLKWSTGH         | SQGLVTAVTI         | AASDSDSFL          | KNSLTAVSLL        | <b>LFIGSRCLST</b>  |
|              | 301                     | YPRTSLPPTM        | QSDLSLNGEG        | RPSPLMSVRD        | LSIKQVEKFI        | BQTNLSHVRK        | KHIAISLING         | ARNLVLGGP          | ESLYGPNLNL         | RNQGAPMLGD        | <b>QSRVFPSEK</b>   |
|              | 401                     | LKCSNRPLPI        | FAPFHSLLLA        | DATLLELDV         | KEHGLSPEGL        | KIPVYDTPDG        | SDQALKKEPI         | IDRVVVLITE         | LPVHWEAATN         | HKATMLIDFG        | <b>PGGVSGLGLV</b>  |
|              | 501                     | THRNEKGTGA        | RILLAGLTD         | NPIDDEYGFK        | HEIFQTSADK        | AIKWAPDMLK        | ELRPLTVKNS         | EKGIYVTKFE         | QOLLRAPLIM         | VAGMPTPTVN        | <b>TDIVSASLNA</b>  |
|              | 601                     | GHIELLAGGG        | YFSPVMTRTA        | IDDIVSRIRK        | GYGLGINLIY        | VNPFMLQWGI        | PLIKDLREKK         | YPIQSLTIGA         | GVPSIEVATE         | YIEDLGLTHL        | <b>GLKPGSVDAI</b>  |
|              | 701                     | SQVIAIAKHA        | PTFPVILQWT        | GGRGGGHSF         | EDFHQPIIQM        | YSKIRCSNI         | VLVAGSGFGS         | DEBTTYPLSG         | YNWSEKFNYP         | KPFDGVLFGS        | <b>RVMTSKBSHT</b>  |
|              | 801                     | LSAAKKLIVE        | KQCVDPQWE         | QTYKPKAGGI        | ITVRSMEGEP        | IHKIATRGMV        | FVLELDDTIF         | NLPKNKLLDA         | LNKRKHDIK          | MPNDGFQKPV        | <b>FGKANVGVCD</b>  |
|              | 901                     | LQEMTYKEVA        | NRLVELMYVK        | KSHRWIDVSL        | RNMVGDPLRR        | VEERFTSSAG        | TVSLQLQNFQ         | LNPEPQFAD          | FFVFKPQAGK         | QLISEEDCDY        | <b>FLMALARPGQ</b>  |
|              | 1001                    | KVPFPVPLVD        | RFEPFFPKKD        | SLWQSEDLSE        | VVDEVDVCTR        | LLHGVFVASQY       | KTVDEPIGD          | ILNSIHGHIH         | ARLILKEEYAG        | DESKIPVVEY        | <b>FGGKIPASVS</b>  |
|              | 1101                    | ATSVNVTDGN        | QVVEYIDSEL        | PNKQEWLDDL        | AGTELNLWQA        | FISTDRIVQG        | SKHVSNPJHD         | ILTPAKHSKV         | TIDKTKTKLT         | AFENIKGDLL        | <b>PVVEIELVKE</b>  |
|              | 1201                    | NTIQLSLIEH        | <b>RTADANFVAL</b> | <b>PFLYKYNPAD</b> | GFAPILEIME        | DRNERIKEFY        | WKLWFGSSVP         | YNSNDINVEKA        | ILGDEITISS         | QTISEFTHAI        | <b>GAKDCAFVDR</b>  |
|              | 1301                    | PGKATLAPMD        | FAIVIGWKAI        | IKAIFFPKSVD       | GDLLKLVHLS        | NGYKMITGAA        | PLKKGVDVST         | KAEIKAVLNQ         | PSGKLVBEVG         | TIYREGKPEV        | <b>EVTSQFLYRG</b>  |
|              | 1401                    | EYNDYCNLTFQ       | <b>FKTETPVQVA</b> | <b>FKSAKDLAVL</b> | RSKENFHEK         | DVQFDVLTRG        | CESTYKFKSA         | NVYSSIKTGT         | QVLELLEPTK         | VIYQGSVDVE        | <b>ACTSYGNVPT</b>  |
|              | 1501                    | DYLSRNGKTI        | EESVIFENAI        | PLSSGEEELS        | <b>KAPGTNEPYA</b> | <b>IVSGDYNPIH</b> | <b>VSRVFAAYAK</b>  | LPGTITHGMY         | SSASIRALVE         | EWAANNVAAR        | <b>VRAFKCDVFG</b>  |
|              | 1601                    | MVLPNDTLTQ        | TMEHVGMING        | RKLIKVETRN        | VEDELPLVIG        | EAEIEPTTTF        | YVFTGQSSQE         | QMGMELELYNS        | SEVARVEWDK         | ADRHVFNMYG        | <b>FSDILDIQNN</b>  |
|              | 1701                    | PNELTILHFG        | KAGRAIRDNY        | IGMMFFETIGE       | DGALKSEKIF        | KDIDETTTYSY       | TVFSPPTGLS         | ATQFTQPALT         | LMEKAYVEDI         | KSRGLPLPSDI       | <b>MPAGHSIYBN</b>  |
|              | 1801                    | SALSSLANVW        | PESLVDVVF         | YRGMTMQAVV        | PRDELGRSNY        | GMVAVNPSSV        | <b>SATFDDSSALR</b> | FVVDEVANKT         | KWLELVVNYN         | VENQYQVAAG        | <b>DLRALDTLTN</b>  |
|              | 1901                    | <b>VLNVLKLNKI</b> | DIVKLQEQMS        | IEKVKEHLYE        | IVDEVAAKSL        | AKQPIDDLER        | GFAVIPLKGI         | SVPFHSSYLM         | SGVKPFPORFL        | CKKIKPKSSVK       | <b>PQDLIGKIYIP</b> |
|              | 2001                    | NLTAKPFELT        | KEYQSVYDL         | TKSEKIKSIL        | DNWEQYE           |                   |                    |                    |                    |                   |                    |
|              | <b>KEM1</b>             | 1                 | MNSILHTCTH        | SNDNTITRSL        | DDQMYAAIFN        | YIEHLFQIIK        | PQKTFYMAID         | GVAPRAKMNQ         | QRARRFRATY         | EAEINLKKAI        | ENGEIPEKED         |
| 101          |                         | TFEMANTLNN        | LKYFIHKKIT        | EDSSWANIEI        | ILSGHEVPGE        | GEHRIMEYIR        | SIRSQDDYNP         | NLRHCYGLD          | ADLIMLGLVT         | HDPHFALLRE        | <b>EVTFGPQRKV</b>  |
| 201          |                         | GPKDLHQKQF        | YLLHLALLRE        | YLSLEFQIEI        | NQNLNFEYDFD       | RILDDPILIM        | YVIGNDFLPN         | LPDLFINKGA         | <b>PFLILAAAFKQ</b> | TLLESDDGYIN       | <b>ENKGINLVLV</b>  |
| 301          |                         | NIYIKILSKF        | ELENFEKHEV        | DVEWPNKLLD        | DISISGEKRR        | QRIGKLLILK        | EQKLLVGFIK         | PWLMEWASQP         | INELLNLDQO         | GKLPDLHLNK        | <b>DVEKNLEFPI</b>  |
| 401          |                         | KEFAIEAGFL        | IHSQSNNDTY        | EAKLDIDGIS        | PTSESEEBHE        | RITLBRKTIK        | QYQSANLIES         | EBVLNETKEV         | YSEKFSQWKN         | DYVQPKLHFS        | <b>IDTEBEGGDL</b>  |
| 501          |                         | IEMTKHYEIG        | LQWVLYYYIR        | GCPSWNWYIR        | YHYAPRISDI        | SLGLEELLNE        | KTDLKFELSH         | PFKPFQOLMA         | VLVARSKMLN         | PYVTRPLMSD        | <b>EKSPINFPY</b>   |
| 601          |                         | HEVDIDMNGK        | TASNEAVVLL        | DFVDEKLEIE        | ALKPIESKLT        | PEEKQRNSYV        | HAIKFHLNQP         | IDHVFSSPLP         | GFPHDLHEDQ         | CYEBEFKLPK        | <b>IENLKI GFIK</b> |
| 701          |                         | GAKTGKDLA         | <b>GFPTLSTIFP</b> | <b>TSELALNEVK</b> | IFNFPSSRES        | MILNVEDVWS        | DLTVAQFAQS         | FVNLKLVYSKW        | VFLRECRVVK         | YVSEENKFP         | <b>IKTNTGLKKV</b>  |
| 801          |                         | VTNELSVEDK        | KSFRSEVSNL        | KVTWDKFKGV        | KLGEINALVY        | VKPVNHLIRN        | KHGAIVKTYV         | <b>KDVEVYPLQL</b>  | <b>PKLEIRNNDKQ</b> | RYLTRPPLPI        | <b>DOQFPIDLSQV</b> |
| 901          |                         | VFLGDMAYGS        | PAKIVGYNED        | KTKLGVKIFK        | IQSTAEPNIG        | KKRILTBEKNE       | IKVYPSFEVA         | KTLRLNPLLL         | SKLITSQFMVQ        | SDSSGKGVNIG       | <b>LELKFPESKRQ</b> |
| 1001         |                         | KVLGYTRKSS        | NGKFWFESPL        | AINLINTYKT        | GFAPLFXKLL        | <b>NNVSGSNFTK</b> | <b>IVYSSISLEEL</b> | KEIRSWLKEV         | <b>KSELIPVMSLE</b> | <b>SESFKTFSYQ</b> | <b>ATEQVMSNRYL</b> |
| 1101         |                         | SMNQIPIPTK        | DIKGVPREAI        | LNANESYQLL        | SQDRFELGDR        | <b>IIVYQDFGKV</b> | SILSKGTVAS         | ILTVGSKTSL         | GVIPDQPLLS         | NNMNGKLNLS        | <b>NRGLIIDSSL</b>  |
| 1201         |                         | VLNLTNCFQV        | YHSHASKNRK        | KLTDDEKIAK        | LKAIIEAKNQ        | KQQQKVEQKQ        | QKGANELLSL         | LLKXKSDMNST        | TTNSTDGDC          | KLTKTEKDYD        | <b>IKTEKDYD</b>    |
| 1301         |                         | NNGNEDERVD        | PNAIKQIYGH        | IYSNVMNQGN        | VRPPPPPTG         | PGHQPPFPY         | MP1PPGAPM          | HPGIYIPVVG         | NPLPPSFYQQ         | YPPNGQVFN         | <b>SQPPPPPPPP</b>  |
| 1401         | PSQQQQPVA               | ESTSDEKSKN        | DNKHVNWGRG        | RGGRGRGRGY        | RGRGRGRGRG        | GNKSSHQNQ         | PKDKVKQES          |                    |                    |                   |                    |
| <b>SLA1</b>  | 1                       | MSSIIYGVYK        | ALYDYAAQAE        | EELNIKQNDL        | <b>LYLLEKSDID</b> | DWVKVKKRVV        | <b>ATGEEIVDEP</b>  | <b>SGLVPSTYIE</b>  | <b>EAPVIKTATA</b>  | LYDYDKQTEE        | <b>ELSPNENDKF</b>  |
|              | 101                     | NVFDLNDPDW        | ILVGDLAKEK        | FGFVPSNIYQ        | LDSTAEPAQH        | QQQQQQQVQF        | PPPQQQAIP          | QQQTQIPINN         | FPFPPHTKDR         | TPDFPAPPAP        | <b>RDRSPEHPPP</b>  |
|              | 201                     | TPEKDYPRMF        | EQEPRSLGSR        | YDRQPEGREE        | EDEEAAPPMP        | SRPTGNSNIVA       | PEPVVGRSNT         | YEQBEENVEHS        | EHSYDGEFFT         | WYIDEVDGRK        | <b>KRAIKLSIGQ</b>  |
|              | 301                     | GLVVIKPNNT        | NPKKLRMRSS        | SSLDNQWRIK        | DLITFNNEKK        | HVFLFKPNPA        | ASLELHAGSK         | DVAEAIMAIL         | GDLKGAEAAR         | GLREVAKASK        | <b>ASANERNRNI</b>  |
|              | 401                     | GRLLYDFEVO        | GDELDCKEKG        | DEVYIIDQKK        | SKDWMVVENI        | ATRRQGVNPS        | TYIEIISTSN         | LDKLTGDLPL         | RKSTKSKGRV         | VETKDKRSSH        | <b>HRTREERDRI</b>  |
|              | 501                     | REKDKRAQRK        | APTSQTEQDK        | SMPNPHRVRT        | WIDSSGTFVK        | EAEFLGCVBG        | KIHLHKTNGV         | KIAVAADKLS         | <b>VEDLEVERVY</b>  | TGTSLELYQKE       | <b>QVMAQQAKRA</b>  |
|              | 601                     | KSKSKSGATA        | TPSSSTNETKY       | ASSATAAIND        | IAPPKPTRPQ        | TTTQVSNNGA        | LVYDFWDFPL         | ECQVDIGNCQ         | RYTLNFEREQ         | <b>MDENILEDIS</b> | <b>PSLLRRTLGLR</b> |
|              | 701                     | EGDIIRVMKY        | LDAKFDKRKT        | PEAPQQNGGL        | FIDKNGNLKN        | NSSSTIEISKV       | SADALPSPVK         | TQVTSFTPVN         | VEATQNNKIE         | DDAWAMKPA         | <b>RSSDELKPS</b>   |
|              | 801                     | POPQTPQYTG        | ALSDLVNIKP        | VGTSNENKAK        | TEQIPVEPSA        | PALQPKMKTN        | TAATSSIPPP         | GGVTPQRTG          | TLVPEVQKGG         | LVPVQRTGAG        | <b>LVPVQRTGGL</b>  |
|              | 901                     | PAQPTGFVPI        | TAQPTGFIP         | QATGILQPLQ        | TFGIVPLQTG        | TSTFNANNKT        | APPRPDATAP         | PITTFGQOFT         | FQPAFVPLQT         | GVITMPQTF         | <b>GGQSQQLPTQ</b>  |
|              | 1001                    | ITGGAPQTS         | FNQPALVPTQ        | RTGGQITGGF        | VQSNFNGKQI        | TGGFMDTNTL        | SFGQQTIGNA         | QQQPPSTSF          | QQQITGGLPA         | TSFGQOITGG        | <b>FPQTSFGQQM</b>  |
|              | 1101                    | TGGAPQTSFG        | KHITGGMNPN        | TSFGQPFSSQ        | ATSNPPQMA         | NQFTQQQQQY        | QQQVPMNQFQ         | QQPQQQQQPF         | YNPQSQPNL          | NQMTNMFQNT        | <b>SISSPATFNQ</b>  |
| 1201         | QIPTTTFGQQ              | PQFEGFGSQP        | LQSQPTGMGF        | GNAPLQSQPT        | GKRANLQAAT        | FDNPPFGF          |                    |                    |                    |                   |                    |
| <b>TIF46</b> | 1                       | MSDNTTSNQS        | STGDSKSTPG        | AVPSSTDGSS        | SAPIGNSVNS        | VDQTSVSTDK        | QHGNNQVQPS         | SGAYSQGNYN         | ANYQYGGYNN         | NYNNNYNNNN        | <b>NNPNYYHKN</b>   |
|              | 101                     | QYNKNYTGNG        | SGGSGGRQNN        | YNNANQNNQN        | QRNNKMKQY         | NQKMMHHHHH        | NOQQPQQOYV         | NYPYNTAAAA         | ASQMYGYMNP         | GYPQYVGLPL        | <b>QYGGIPATPG</b>  |
|              | 201                     | QYYPQVAVSP        | VVPTVQFQOI        | STPPTPKIRL        | TKDKGKPVLD        | DEKRRKTASS        | TPVASFQPAR         | ATTVSSSEKDK        | TPSSSATPAT         | ENKPAIGASIA       | <b>EEFKKTRIRER</b> |
|              | 301                     | AAAAAASAAK        | GKETKEETKE        | ETTATETKKE        | TEETPIAKES        | SSTVDQPSVV        | PQESHKDIV          | ETPKPEVETV         | STKNDLELPA         | DETKELVSSA        | <b>EETNDTAVEK</b>  |
|              | 401                     | PKVEEKPEVE        | NDKVESQIEL        | QSPSVEGDSE        | SIVENEDBEE        | STISEKGEPO        | TETETETETQ         | TEPEPESEPT         | PTANAPEFTI         | SQFLERLKIA        | <b>TPIDDILATK</b>  |
|              | 501                     | <b>YPETIQGVDS</b> | <b>SKQISGKKYR</b> | <b>YDPQLIQFR</b>  | <b>VDISYTTDPT</b> | <b>FKAHLESLDI</b> | HPNAMKRSQS         | TRDASSRGLL         | PNKPTGGLPA         | RFNPGGGKGG        | <b>GQFDGGGRQS</b>  |
|              | 601                     | RSGSRKGGGR        | GASSRDKSTR        | KGTPSKRGRG        | GGDRSEMRER        | GGAGAAGAGG        | AGGENDGNQO         | GDGKPVVEVK         | PLEKSNARKE         | PKSRMQAKRE        | <b>TKVABDGTIL</b>  |
|              | 701                     | <b>LEPEDIKTKT</b> | KSLLNKLTL         | MFTAISDEII        | ALTNSQKHEK        | DAATIKQIIS        | LTPAKACDEP         | HWSEMYAKLC         | AKMCTSVNSD         | ITDESITLTKD       | <b>GTHASGVGLA</b>  |
|              | 801                     | RRLLNATCQK        | EYEGKWTDKL        | FTNPDGSSLE        | PEMMSDEYYA        | MAAAAKRRGL        | LVKFIGHLYN         | LNMLNDHVIV         | VCLMDQTKNT         | <b>VDESDDSLNE</b> | <b>LTLQLQITVGP</b> |
|              | 901                     | KLDSNERTRT        | MLKIVFDYIE        | KVLEGVKLT         | RKFLMLDLQ         | DLREAKVWSL        | KGDAGKPTIE         | EIHRDABIKK         | MEBERAKNEK         | KRKHQQLGGG        | <b>VGGGSDSRSN</b>  |
|              | 1001                    | SSRGGSNWNN        | NNNNNNNNNN        | NQSSNGPFMK        | KSPSPMTQRV        | GSSRSPTST         | FQNSDLQRTD         | SKRSEPSQSN         | IFAALEGGDD         | DEDE              |                    |



|                        |                                                                                                                                                                                                                                                                                                                                                                                                                                                                                                                                                                                                                                                                                                                                                                                                |
|------------------------|------------------------------------------------------------------------------------------------------------------------------------------------------------------------------------------------------------------------------------------------------------------------------------------------------------------------------------------------------------------------------------------------------------------------------------------------------------------------------------------------------------------------------------------------------------------------------------------------------------------------------------------------------------------------------------------------------------------------------------------------------------------------------------------------|
| <b>SSA1</b>            | <p>1 MSKAVGIDLG TTYSCVAHFA NDRVEIAND QGNRTTSPFV APTDTERLIG DAANKQAAMN PANTVFDADR LIGRKFDDHE VQGDIKHPPF KVVDKASKPM<br/> 101 IQVEYKGETK TFSPEEISSM ILGKMKETAE GFLGTTVKDA VVTVPAYFND SQRQATKDAG TIAGLNVMRI INEPTAAATA YGLDCKSEAE KNVLIFDLGG<br/> 201 GTFDVYLLSI EDGIFEVKAT AGDTHLGGED FNRLNVNFFI QBFKRKNKRD ISTNQALRR LRTACERAKR TLSSSAQTSI EIDSLYEGID FYTSTRARF<br/> 301 EELCADLFRS TLEFVDKVLS DAKIDKSKVD EIVLVGGSTR IPKVQKLVSD YFNKGEPNRS INPDEAVAYG AAVQAALSG DTSSTKQDLL LLDVAPLSLG<br/> 401 IETAGGIMTK LIPRNSTIPT KKSETFSTYA DNQPGVLQV FEGERAQTKD NLLGKGFELS GIPPAPRGVP QIEVTFPIDA NGILNVSALE KGTGKTQKIT<br/> 501 ITNDKGRLSK EIEKMWSEA EKFKEEDEKE ASRVQAKNQL ESYAYSJKNT LGEEQFKSKL DASEIEEVTK AADETIAWLW SNQTATQEEF ADQKQKLESEK<br/> 601 ANBIMTKAYQ AGATPSGAAG AAPGFPFGA APEPSNDGPT VEEVD</p> |
| <b>SSB1</b>            | <p>1 MADGVFQGA I GIDLGTYS VVATYDSAVEI IANEQGNRVT PSFVAPTSEE RLIIGDAAKNQ AALNPKNTVF DAKRLIGRAF DDESVDKDIK SWPFKVVESN<br/> 101 GQPLIEVEYL DETKTFSPQE ISSMVLTKMK EIAEAKIGKK VEKAVVTVPA YFNDAQRQAT KDAGAIAGLN VLRIINEPTA AAAYAGLGG KSEKERHVLI<br/> 201 FDLGGGTFDV SLLNITGGVF TVKATAGDTH LGGQDFDTNL LEHFKEFKQK KTGNDISGDA RALRRLRTAC ERAKRSLSSG TQTTVEIDSL FDGEDFSANI<br/> 301 TRARFEDINS ALFKSSTLEPV EQVLKDAKIS KSGQDEVVLV GGSTRIPKVQ KLLSDFFDGK QLEKSINPDE AVAYGAAVQG AILTQGSTND DTKDLLLDDV<br/> 401 IPLSLGVAMQ GNVFAPVVR NTVPTIKRR TTTVADHQT TVQFFVYQGE RVNCTENTLL GEFDLKNIPP MQAGEPVEA IFEVDANGIL KVTAVEKSTG<br/> 501 RSANITISNS IGRISTEIEI KMISDAEKFK SSDDAFAKRH EQQKLEAVV ASVESTVTDV VLSAKLKSA KDKIEAALS D ALQTLIEIES SADDYRKAEL<br/> 601 ALKRAVTKGM ATR</p>                                  |
| <b>TEF1</b>            | <p>1 MGKEKTHVNV VVIGHVDSGK STTGHLIYK CGGIDKRTIE KFEKEAAELG KGSFKYAWVL DKLKAERERG ITIDIALWKF ETPKYHVTVI DAPGHRDFIK<br/> 101 NMITGTSQAD CAILLIAGGT GEFEGAGISKD GQTRHALLA YTLGVKQLIV AVNKMDSVKW DKNRFEEIHK ETSNFVKVGV YNPKVTFPVF ISGWNGDNMI<br/> 201 EPSTNCVPYK GWEKETKSGK VTGKTLLEAI DAIEPPTRPT DKPLRLPLQD VYKIGIGTV PVGRVETGII KAGMVTFFAP AGVTEVKS EMHHEQLAEG<br/> 301 VPGDNVGFNV KNVSVKEIRR GNVCGDSKND PPKGDSFNA QVIVLHNPQ ISAGYSVPLD CHTAHIACKF DTLVEKIDRR TGKLEENPK FVKSGDAIV<br/> 401 KMVPTKPMCV EAFTDYPPGL RFAVRDMRQT VAVGVKSVE KSDKAGKVTK AAQKAACK</p>                                                                                                                                                                                                                                    |
| <b>TEF2</b>            | <p>1 MGKEKTHVNV VVIGHVDSGK STTGHLIYK CGGIDKRTIE KFEKEAAELG KGSFKYAWVL DKLKAERERG ITIDIALWKF ETPKYHVTVI DAPGHRDFIK<br/> 101 NMITGTSQAD CAILLIAGGT GEFEGAGISKD GQTRHALLA YTLGVKQLIV AVNKMDSVKW DKNRFEEIHK ETSNFVKVGV YNPKVTFPVF ISGWNGDNMI<br/> 201 EASTNCVPYK GWEKETKSGK VTGKTLLEAI DAIEPPTRPT DKPLRLPLQD VYKIGIGTV PVGRVETGII KAGMVTFFAP AGVTEVKS EMHHEQLAEG<br/> 301 VPGDNVGFNV KNVSVKEIRR GNVCGDSKND PPKGDSFNA QVIVLHNPQ ISAGYSVPLD CHTAHIACKF DTLVEKIDRR TGKLEENPK FVKSGDAIV<br/> 401 KMVPTKPMCV EAFTDYPPGL RFAVRDMRQT VAVGVKSVE KSDKAGKVTK AAQKAACK</p>                                                                                                                                                                                                                                    |
| <b>ORF<br/>19.7085</b> | <p>1 MFSPPFYNGDY SYDQPIDFES LFDLLHQHQP YYKENTRPRV IKKLETEDEF QIQIYKPYGN YNNYEVNVVK SNPPIVNVVI SSVQDNFKTV LFPNVNYIDI<br/> 101 DNINWQWYK QNVLVLNIPK RIHYVHSNVQ DILNCLLGCN DADASSALKA PNQOPYAKPQ TKKDVQAKTS PKKKEEFKVK KKEIANNNNN NLASRDANLK<br/> 201 DSIEEHNLI EQAANALKQA TENSCKQVKQ DLNGKANALS AGAQAAEAHK HKEALEKTKQ ELEAQRKAAH DKIVKAQQEL EBIARKEAEA VKLHEAAKQK<br/> 301 ELBEEKRQVE AEQQKAKEKE DLEQKEYDQF VKQQQEBLQK FFGFNLGPAI PTKDGANAFY TAAKQAKKQK PKVAPKPKQL QTQPVKQAKD EESIPSEPE<br/> 401 TEEPESKSH NSNENLHKHP SLEEEVEDES VMFRFRFGH</p>                                                                                                                                                                                                                                                   |
| <b>ENO1</b>            | <p>1 MSYATKI HAR VYVDSRGNPT VEVDFTDQK LFRSIVPSGA STGVHEALEL RDGDKSKWLG KGVLKAVANV NDIIPALIK AKIDVVDQAK IDEFLLSLDG<br/> 101 TPNKSKLGN ALLGVSLAAA NAAAAAQGIP LYKHIANISN AKKGKPVLPV PFGVNLGGS HAGGALAFQE FMIAPTGVST FSEALRIGSE VYHNLKSLTK<br/> 201 FAPTKTWRWR NVKVNHNKR YATASALAS AVTSLVLAR GHRVEQVKELP LVVSNFESV KTKDVAVAL KAVGAHKDVV KVIKSKLRA GKGKLRGRFF<br/> 301 ABDDNDVAWH PFERVGDQIK IVGDDLTVTN PIRIKTAIEK KANALLLVK NQIGTLTBSI QAANDSYAAG WGVVMVSHRS ETEDDTIADL SVGLRSQGIK<br/> 401 TGAPARSERL AKLNQILRIE EELGSEAIYA GKDFQKASQL</p>                                                                                                                                                                                                                                                        |
| <b>LYS12</b>           | <p>1 MLAARSSIRR CFSTSTTLK SLKIGLIPGD GIGREVIPAG KAVLENLPAK HDLQFQFVNL DAGFELFKKT GTALPDQETVD VLKKECDGAL FGAVSPTTK<br/> 101 VAGYSSPIVA LRKLLGLYAN VRPVKSVGIK GRPVDMIVR ENTEDLYIEM ERYVKKEDGT KVAEAIKRIT ETASTRIAKM AYEIALQREA VRKGTSGKQL<br/> 201 HEKSPVTVTH KSNVLSQSDG LFRQTCRAVY DANANEYGGI EYKQIVDSM VYRMFPREPI FQVVAVNLPI GDILLSGAAA LVGSLGVVPS ANVGDNPAIG<br/> 301 EPCHGSAPDI EGKGISNPVA TIRSTALMLE FMGYPEAAAT IYQAVDANLA EDKIKTPDLG GNSTTQEVID DIIRRF</p>                                                                                                                                                                                                                                                                                                                                 |
| <b>RPL4B</b>           | <p>1 MSSRPQSVI SVKGEQSSQ LPLPAVFAAP VRPDLVHSVF VRVKNKRQA YAVAENAGHQ TSAESWGTGR AVARIPRVGG GQTHRSQQA FGNMCRGGRM<br/> 101 FAPTKTWRWR NVKVNHNKR YATASALAS AVTSLVLAR GHRVEQVKELP LVVSNFESV KTKDVAVAL KAVGAHKDVV KVIKSKLRA GKGKLRGRFF<br/> 201 TORRGPVLYV AQDNGIVKAL RNVPVETAS VKHLGLLQLA PQAHLGRFII WTQAFESLD SVYGSSTKS IKSQYTLPSN IISNTDVTDL INSAEVQAVV<br/> 301 RPAGEKTKK SHVLKKNPLK NKQVLLRLNP YAKAYAAEKV GSAKVEQAKV KPSKQGFQAEV LKN</p>                                                                                                                                                                                                                                                                                                                                                        |
| <b>TDH3</b>            | <p>1 MAIKIGINGF GRIGRLVLRV ALGRKIDIEV AVNDPFIAPD YAAVMFKYDS THGRYKGEVT ASGDDLVIDG HKIKVQPER PANIPWKGSG VDYVIESTGV<br/> 101 FTKLEGAQKH LDAGAKKVI I TAPSADAMPF VVGVDNDKYT PDLKII SNAS CTNCLAPLA KVVNDTPEGIE EGLMTVHSI TATQKTVDGP SHKDWGRGRT<br/> 201 ASGNIIPSST GAAKAVGKVI PELNGKLTGM SLRVPPTDVS VVDLTVRLKK AASYEIAQA IKKASEGPKL GVLGYTEDAV VSTDFLGSY SSIPEKAGI<br/> 301 LLSPTFKVLI SWYDNEYGYS TRVVDLLEHV AKASA</p>                                                                                                                                                                                                                                                                                                                                                                              |
| <b>NOP1</b>            | <p>1 MAFGAPRGRG GPARGGRGGF GGGRRGGGA RGGRRGGARG GSRGGARGGA RGGARGGARG GRGGARGGAR GGAQVVEIEP RHAGVFIARG KEDLLVTRNI<br/> 101 APGESVYGEK RISVEEPAKE EGAAPTKIEY RVWNPPRSKL AAGIMGGIDE LGTAPGKVL YLGAASGTSV SHVADVUGE GLYVAVFESH RPRELIGMA<br/> 201 KKRPNVPII DDARHPQYR MLIGMVDFCV ADVAQPDQAR IIALNSHLFL KDGLLVISI KANCIDSTVD AETVFAREVQ KLREERIKPL EQLTLEPYER<br/> 301 DCIVVGRYM RSGKK</p>                                                                                                                                                                                                                                                                                                                                                                                                         |
| <b>NPL3</b>            | <p>1 MGDPEVETKQ LFRVPLRNDV TREEVQDHS RAAPVVEVRL MEGYAVTFPE NEDDAQALE LLNDAEFNGE KLQIEFAKER REDTRGKYRL LITNLAEFTA<br/> 101 WQDIKDFVRE KTDSPQSYVK VFTNFDNGET TCSMQFQSR E DLDRAIPLLD KAVFRDITIG ABEEDTSPYIP PPPRGRGGFR GRGRGGFDRG FRGGRGGYDR<br/> 201 YDRGFRGGGR GGFDRGFRDG GFRGGRGGYD RGGFRGGRG FDRGGFRGGR GFRGGRGGY DRGGYDRDNF NDRGGSYDRE RSPTRF</p>                                                                                                                                                                                                                                                                                                                                                                                                                                            |
| <b>RPL8B</b>           | <p>1 MAPKGGKVP APLATKSAS SESKNLPEFS TPKNFIGIQS IQPKRNLRSF LVWPEYVRLQ RQKILSLRL KVPSIAQFS QTLDKNTAAQ AFKLLNKYRP<br/> 101 ETSAEKKERL TKEAAAIAEG KTAKDVSPPK VVVYKGLNHV VSLLEKNKAK LVLIANDVDP IELVFLPAL CKKMGVPIAI VKGKARLGLT VHKKTSAVAA<br/> 201 LTEVNSADEA ESKLISTIN ANYIEKYEEN RKHWGGGIMG SKANDKIACK AKAAAAAVST SN</p>                                                                                                                                                                                                                                                                                                                                                                                                                                                                          |
| <b>RPS7</b>            | <p>1 MSSKILSEN TELELKVQA FVDLESQADL KAELRPLQFK SIKEIDVNGG KVALAVFVPP PSLQAYRKVQ TRLTRELEKK FPDRHVFLA ERRILPKPAR<br/> 101 KARKQQRPR SRTLTAVHKD ILEDLVFPEE IIGKRVLYL GGNKIQKVLK DSKDSTAVDY KLDSFQQLYS KLTGKQVVEF IPGESH</p>                                                                                                                                                                                                                                                                                                                                                                                                                                                                                                                                                                      |
| <b>ORF<br/>19.8442</b> | <p>1 MSWFGFFDPP FDDFFGRPRK YATEVPPNPN PRKIAQGDNG KQQQVSRYGA GAGPHRALA RRDFFDDEFV KNFSSGGYFV GFDDNVKITE ESDKYVVSVD<br/> 101 QENLSPDEVN VDFDKQENEL IITVTQETEK DGTKKSSTFH SNLKFKEPVN FDDISAEIGE QGVQVTLPKV HADHEKIVNI PISKAAAK</p>                                                                                                                                                                                                                                                                                                                                                                                                                                                                                                                                                                |
| <b>RPL16A</b>          | <p>1 MSQVAPKWYQ SEDVPAPKQT RKTARPOKLR ASLVPGTVLI LLAGRFRGKR VVYLKNELDN TLLVSGPFKV NGVPLRRVNA RYVIATSTKV NVSGVDVSKF<br/> 101 NVEYFAREKS SKSKKSEAEF FNESQPKKEI KAERVADQKS VDAALLSEIK KTPLLKQYLA ASFSLKNGDR PHLLKF</p>                                                                                                                                                                                                                                                                                                                                                                                                                                                                                                                                                                            |
| <b>RPL11</b>           | <p>1 MSQVAPKWYQ SEDVPAPKQT RKTARPOKLR ASLVPGTVLI LLAGRFRGKR VVYLKNELDN TLLVSGPFKV NGVPLRRVNA RYVIATSTKV NVSGVDVSKF<br/> 101 NVEYFAREKS SKSKKSEAEF FNESQPKKEI KAERVADQKS VDAALLSEIK KTPLLKQYLA ASFSLKNGDR PHLLKF</p>                                                                                                                                                                                                                                                                                                                                                                                                                                                                                                                                                                            |
